# Supplementary material for: Adapting an evidence-based contraceptive behavioural intervention delivered by mobile phone for young people in Zimbabwe
Source: Springer Nature journal article supplement (doi:10.1186/s12913-022-07501-9), 2022-01-25
Supplement: MOESM3 [file 20067594]

**Discussion guide used in Round 2 testing of the adapted intervention**

**CHIEDZA contraception study**  
**co-design/message-testing discussion guide**

**INTRODUCTION**

- *“We have developed mobile phone messages about contraception and safer sex, which young people who attend CHIEDZA can sign up to receive on their phone*
- *We talked to young people in Zimbabwe about contraception and safer sex. We used what we learned from these discussions to make the messages.*
- *Right now, we want to ask young people what they think of the messages, to make sure people like them*
- *Please be honest- it is important that we know what doesn't sound right so we can improve the messages”*

*Key points to reiterate:*

- Don't have to take part if you don't want to
- There are no right or wrong answers
- I am here to facilitate the discussion, not to answer any clinical questions or provide advice
- (FGD) We are interested in a range of views, so it's ok to disagree with each other
- Check again that they are ok with audio recording, explain confidentiality and anonymity
- It will last up to 60 mins
- You can leave when you want without having to give a reason
- You don't have to talk about anything you don't want to talk about

**INFORMED CONSENT**

- Check that they have all had time to read the information sheet
- Answer any questions
- Give them the consent form to sign (signed by you too)
- Drop off consent straight after at BRTI

*Rules (for focus group):*

- Please respect each other's confidentiality by not sharing anything with anyone outside the group that might identify people in the group
- Respect each other's opinions
- Don't interrupt
- Please one person speak at a time so that we can understand the recording
- Can take phone calls (please leave the room for the conversation)

**PART 1: FIRST IMPRESSIONS OF THIS MESSAGES**

- *“Here are the messages. We will send 0-3 messages per day, over 4 months (they will not all come at once).*
- *Messages on the same topic come either on the same day or days next to each other*
- *Young people would only receive the messages if they request them at their visit to CHIEDZA. We would never send the messages to anyone who did not ask to receive them*
- *Please take 15 minutes or so to read through them.*
- *Please make any comments in the space to the right about the message. For example, if you do not understand any words or if you like or do not like anything about the message, please note this and why.*
- *After you read through the message, we will talk through any comments you had.*
- *When reading the messages please make a note of any words that you do not understand.*
- *Also, this is not a test- we need young people to help us make the messages better”*

*(After giving them 15 minutes or so to read through the messages)*

**START RECORDER**

1. What is your overall impression of the messages? [EXAMPLE PROBES: How interesting were they?]
2. How do you think you would feel receiving them on your phone (0-3 messages a day over 4 months)?
3. What comments did you have on specific messages? [PROBE: if they say they liked/did not like any messages, really try to understand what it was that they liked/did not like and why.]

**PART 2: TONE**

4. Who does it sound like the messages are coming from? Is this good? Why/why not? [PROBE: For example, CHIEDZA, from a clinician, a teacher, a friend, an aunt, etc.?]
5. For example, what do you think about how #82 sounds?

*Remember it's about your health and you have the right to choose what is right for you regardless of how others think and feel.*

6. How can we make the tone of the messages better so that more young people will like them and read them? PROBE: what do you think about making the language more informal/street? Could you give examples about where we can do this in the messages?

**PART 3: CONTENT**

7. What do you think about how #7 is worded?

*There are many contraceptive methods that are taken in different ways. This is to give people choice about what works best for them. Some methods are better at preventing pregnancy than others.*

8. Are there other words that young people use for the methods mentioned in #8 (pills, intrauterine device, implant, injection (e.g. Jadelle), patch)?
9. Which wording of #20 is easier to understand? Why?
  - a) *The pill contains chemicals like the ones produced naturally in your body (called 'hormones') and must be taken daily.*
  - b) *The pill contains hormones and must be taken daily.*

10. How easy is this to understand? (In message #8 and #57). How could we make it easier to understand?

*These methods are 99% effective if used correctly.*

11. What myths have you heard about contraceptive methods? What are the most common ones that you've heard?
12. We have tried to simplify the language based on talks we had a few weeks ago with other young people. We have changed the word 'hormones' throughout to 'chemicals' and 'hormonal methods' to 'methods that contain chemicals'. What do you think about this change? PROBE: is it easier to understand or does it make it more complicated?
13. Are there any messages that are not needed?  
If YES, which messages are not needed and why?  
If NO, clarify that they think that all the messages are needed and ask them why they think this.
14. Is there anything missing? (If yes, why should we include it?)

15. What do you think about messages #105-108? [PROBE: Are they useful? Why/why not?]
16. What do you think about the condom messages, #13-18? [PROBE: Are they clear? Are they useful? Why/why not?]

**PART 4: NEW QUOTES & TRAINING**

17. Do you have any experiences with contraception that we can use as an anonymous quote?  
If YES, ask them about their experience (the aim is to obtain a short, real quotes about experiences using each contraceptive method)
18. Would you be interested in being trained to conduct these interviews yourself, along with me? [*We want to help young people gain skills in collecting interview data, if they are interested. This would involve a short training with a researcher, a practice interview and then you would conduct an interview yourself, along with me*]

*“Thank you very much! You have been so helpful. Please contact X if you would like more information about the study”*
